# Supplementary material for: Genomic and Phenotypic Characterization of Campylobacter fetus subsp. venerealis Strains
Source: MDPI journal article supplement (doi:10.3390/microorganisms9020340), 2021-02-09
Supplement: s1 [file s1]

**Table S1. Primers designed in this study for detection of putative virulence genes and T4SS-encoding genes**

| Target             | Primers                     | Annealing temperature | Product size (bp) |
|--------------------|-----------------------------|-----------------------|-------------------|
| <i>cadF</i>        | Fw: ATGAGCCGTTTAGCGTGGTT    | 60 °C                 | 234               |
|                    | Rv: GAGTTGATGATTGCGCTTTGGA  |                       |                   |
| <i>ciaB</i>        | Fw: TTCACGCTGCGATAGGGTTT    | 56 °C                 | 337               |
|                    | Rv: GAGCGCTACTGCGTGAGTAT    |                       |                   |
| <i>invA</i>        | Fw: GCGTTTGACCATCGTATGGAG   | 58 °C                 | 243               |
|                    | Rv: CTCCAACCTTATCCGCTTGAGTG |                       |                   |
| <i>pldA</i>        | Fw: CGCATAGCATTGCGCAGCAA    |                       | 300               |
|                    | Rv: ACTCTTTTGCTATCTGCCACCA  |                       |                   |
| <i>virB2</i>       | Fw: TCTTTTGTTGCTGCTGGTG     |                       | 153               |
|                    | Rv: CTTACTGTTTGACCGCCCCA    |                       |                   |
| <i>virB3-virB4</i> | Fw: ACTTATGGCGGCAGAGGATG    |                       | 482               |
|                    | Rv: CGCCACTTTGACCAAGAACG    |                       |                   |
| <i>virB5</i>       | FW: GCATTCCAGTTGTAGATGGTGC  |                       | 358               |
|                    | Rv: GAGCATTGATCTTTTCCGCC    |                       |                   |
| <i>virB6</i>       | Fw: TTCCAACAGCCATACCGCAT    | 60 °C                 | 426               |
|                    | Rv: TTTGGGCTGGACTTATGGGC    |                       |                   |
| <i>virB7</i>       | Fw: CTTGTTGGTTGCACAAGCGT    | 58 °C                 | 256               |
|                    | Rv: GCGCTATCTCCTGATTGCCA    |                       |                   |
| <i>virB8</i>       | Fw: AACCAGCGTAAATGAAGCCG    |                       | 385               |
|                    | Rv: TGTCGTAAGCGAACTAGGTTGA  |                       |                   |
| <i>virB10</i>      | Fw: TGATTTCGCTCCACACGACA    |                       | 741               |
|                    | Rv: TTGCCTACGAGCAACCAGAG    |                       |                   |
| <i>virD4</i>       | Fw: AATGGCAAAATTCCAAGTCG    | 56 °C                 | 286               |
|                    | Rv: CCTTGCCTGATTGTTTCGATT   |                       |                   |
